# Supplementary material for: Identifying therapeutic targets by combining transcriptional data with ordinal clinical measurements
Source: PubMed Central journal article supplement (PMC5606996; doi:10.1038/s41467-017-00353-6), 2017-09-20
Supplement: 41467_2017_353_MOESM1_ESM.pdf [file 41467_2017_353_MOESM1_ESM.pdf]

File name: Supplementary Information

Description: Supplementary figures and supplementary tables.

File name: Supplementary Data 1

Description: The list of phenotype-associated genes in HD.

File name: Peer review file

Description:

| <b>Down-regulated genes</b>                         |                |                    |
|-----------------------------------------------------|----------------|--------------------|
| <b>Description</b>                                  | <b>P-value</b> | <b>FDR q-value</b> |
| <b>synaptic transmission</b>                        | 1.15E-09       | 4.32E-06           |
| <b>cell communication</b>                           | 4.55E-09       | 8.52E-06           |
| <b>single organism signaling</b>                    | 3.90E-08       | 4.87E-05           |
| <b>signaling</b>                                    | 3.90E-08       | 3.65E-05           |
| <b>cell-cell signaling</b>                          | 7.12E-08       | 5.34E-05           |
| <b>cellular ion homeostasis</b>                     | 5.51E-07       | 3.44E-04           |
| <b>cation transport</b>                             | 1.52E-06       | 8.15E-04           |
| <b>ion transport</b>                                | 2.57E-06       | 1.20E-03           |
| <b>ion homeostasis</b>                              | 3.99E-06       | 1.66E-03           |
| <b>cellular homeostasis</b>                         | 3.99E-06       | 1.49E-03           |
| <b>cellular chemical homeostasis</b>                | 5.49E-06       | 1.87E-03           |
| <b>Up-regulated genes</b>                           |                |                    |
| <b>Description</b>                                  | <b>P-value</b> | <b>FDR q-value</b> |
| <b>nucleic acid metabolic process</b>               | 2.37E-14       | 8.88E-11           |
| <b>RNA metabolic process</b>                        | 6.97E-14       | 1.31E-10           |
| <b>nitrogen compound metabolic process</b>          | 3.21E-12       | 4.01E-09           |
| <b>organic cyclic compound metabolic process</b>    | 3.21E-12       | 3.01E-09           |
| <b>RNA biosynthetic process</b>                     | 7.12E-12       | 5.34E-09           |
| <b>heterocycle metabolic process</b>                | 1.61E-11       | 1.00E-08           |
| <b>cellular nitrogen compound metabolic process</b> | 1.82E-11       | 9.74E-09           |
| <b>transcription, DNA-dependent</b>                 | 1.14E-09       | 3.88E-07           |
| <b>primary metabolic process</b>                    | 1.25E-07       | 2.34E-05           |
| <b>regulation of gene expression</b>                | 1.31E-07       | 2.34E-05           |
| <b>regulation of RNA metabolic process</b>          | 2.50E-07       | 3.90E-05           |

**Supplementary Table 1.**

The GO enrichment of inferred phenotype-associated genes in HD.

| <b>ID</b> | <b>Type</b> | <b>Sex</b> | <b>CAG repeat number</b> | <b>Age at onset</b> | <b>Age at death</b> | <b>Postmortem interval</b> |
|-----------|-------------|------------|--------------------------|---------------------|---------------------|----------------------------|
| HD_01     | HD          | Male       | 45                       | 42                  | 53                  | 14.55                      |
| HD_02     | HD          | Male       | 46                       | 40                  | 54                  | 20.08                      |
| HD_03     | HD          | Male       | 41                       | 45                  | 74                  | 9.11                       |
| HD_04     | HD          | Male       | 44                       | 38                  | 51                  | 19.67                      |
| HD_05     | HD          | Male       | 50                       | 25                  | 40                  | 20.50                      |
| HD_06     | HD          | Male       | 46                       | 39                  | 51                  | 18.88                      |
| HD_07     | HD          | Male       | 44                       | 50                  | 65                  | 24.58                      |
| HD_08     | HD          | Male       | 42                       | 36                  | 53                  | 17.00                      |
| HD_09     | HD          | Male       | 50                       | 28                  | 42                  | 21.25                      |
| HD_10     | HD          | Male       | 47                       | 25                  | 49                  | 18.62                      |
| HD_11     | HD          | Male       | 44                       | 43                  | 57                  | 21.50                      |
| HD_12     | HD          | Male       | 47                       | 40                  | 62                  | 22.50                      |
| C_01      | Control     | Male       |                          |                     | 68                  | 25.00                      |
| C_02      | Control     | Male       |                          |                     | 56                  | 17.32                      |
| C_03      | Control     | Male       |                          |                     | 73                  | 18.02                      |
| C_04      | Control     | Male       |                          |                     | 66                  | 24.55                      |
| C_05      | Control     | Male       |                          |                     | 55                  | 24.83                      |
| C_06      | Control     | Male       |                          |                     | 67                  | 23.12                      |
| C_07      | Control     | Male       |                          |                     | 70                  | 25.83                      |
| C_08      | Control     | Male       |                          |                     | 56                  | 18.51                      |

**Supplementary Table 2.**

Information about samples from human postmortem cortical brain tissue.

| Human                                                 | STHDH cell line                                                       | 12 w R6/2                                             | CHL2                                                 | R6/1                                                  |
|-------------------------------------------------------|-----------------------------------------------------------------------|-------------------------------------------------------|------------------------------------------------------|-------------------------------------------------------|
| <b>B4GALT6</b> , Beta-1,4-Galactosyltransferase 6     | <b>Smpd3</b> , Sphingomyelin Phosphodiesterase 3                      | <b>Smpd3</b> , Sphingomyelin Phosphodiesterase 3      | <b>Sgpp2</b> , Sphingosine-1-Phosphate Phosphatase 2 | <b>Ppap2b</b> , Phosphatidic Acid Phosphatase Type 2A |
| <b>SGPL1</b> , Sphingosine-1-Phosphate Lyase 1        | <b>Gla</b> , Galactosidase Alpha                                      | <b>Neu2</b> , Neuraminidase 2                         | <b>Smpd3</b> , Sphingomyelin Phosphodiesterase 3     | <b>Ugt8a</b> , UDP Glycosyltransferase 8              |
| <b>SMPD3</b> , Sphingomyelin Phosphodiesterase 3      | <b>Sgpl1</b> , Sphingosine-1-Phosphate Lyase 1                        | <b>Ppap2b</b> , Phosphatidic Acid Phosphatase Type 2A | <b>Neu2</b> , Neuraminidase 2                        | <b>Neu2</b> , Neuraminidase 2                         |
| <b>SGPP2</b> , Sphingosine-1-Phosphate Phosphatase 2  | <b>Arsa</b> , Arylsulfatase A                                         | <b>Sgpp2</b> , Sphingosine-1-Phosphate Phosphatase 2  |                                                      | <b>Smpd3</b> , Sphingomyelin Phosphodiesterase 3      |
| <b>KDSR</b> , 3-Ketodihydrospingosine Reductase       | <b>Ppap2a</b> , Phosphatidic Acid Phosphatase Type 2A                 |                                                       |                                                      | <b>B4galt6</b> , Beta-1,4-Galactosyltransferase 6     |
| <b>PPAP2A</b> , Phosphatidic Acid Phosphatase Type 2A | <b>Sgpp1</b> , Sphingosine-1-Phosphate Phosphatase 1                  |                                                       |                                                      |                                                       |
| <b>PPAP2B</b> , Phosphatidic Acid Phosphatase Type 2B | <b>Sptlc2</b> , Serine Palmitoyltransferase Long Chain Base Subunit 2 |                                                       |                                                      |                                                       |
| <b>SPHK1</b> , Sphingosine Kinase 1                   | <b>Sphk1</b> , Sphingosine Kinase 1                                   |                                                       |                                                      |                                                       |

### Supplementary Table 3.

The list of differentially expressed genes involved in sphingolipid metabolism and the corresponding HD models.

| <b>A cluster</b>                                                        |                |                    |
|-------------------------------------------------------------------------|----------------|--------------------|
| <b>Description</b>                                                      | <b>P-value</b> | <b>FDR q-value</b> |
| <b>response to interferon-beta</b>                                      | 1.05E-18       | 1.41E-14           |
| <b>response to stress</b>                                               | 1.14E-18       | 7.72E-15           |
| <b>regulation of immune system process</b>                              | 2.25E-12       | 3.79E-09           |
| <b>innate immune response</b>                                           | 4.26E-12       | 6.39E-09           |
| <b>response to cytokine</b>                                             | 9.56E-11       | 6.14E-08           |
| <b>response to chemical</b>                                             | 1.67E-10       | 1.03E-07           |
| <b>B &amp; C cluster</b>                                                |                |                    |
| <b>Description</b>                                                      | <b>P-value</b> | <b>FDR q-value</b> |
| <b>cell projection organization</b>                                     | 1.42E-11       | 2.02E-07           |
| <b>regulation of nervous system development</b>                         | 3.28E-07       | 2.90E-04           |
| <b>regulation of neuron projection development</b>                      | 3.34E-07       | 2.78E-04           |
| <b>regulation of neurogenesis</b>                                       | 4.39E-07       | 2.96E-04           |
| <b>biological adhesion</b>                                              | 2.13E-06       | 1.04E-03           |
| <b>regulation of axonogenesis</b>                                       | 1.52E-05       | 5.39E-03           |
| <b>actin filament-based process</b>                                     | 4.70E-05       | 1.28E-02           |
| <b>regulation of axon extension</b>                                     | 7.76E-05       | 1.80E-02           |
| <b>regulation of protein kinase activity</b>                            | 8.54E-05       | 1.92E-02           |
| <b>transmembrane receptor protein tyrosine kinase signaling pathway</b> | 8.57E-05       | 1.90E-02           |
| <b>regulation of small GTPase mediated signal transduction</b>          | 1.03E-04       | 2.15E-02           |
| <b>regulation of Ras protein signal transduction</b>                    | 5.64E-04       | 7.41E-02           |
| <b>regulation of Rho protein signal transduction</b>                    | 6.08E-04       | 7.77E-02           |

**Supplementary Table 4.**

Gene Ontology enrichments of the genes from cluster A, B and C.

**Component of 146 genes with IEZ > 0**

| Description                | P-value  | FDR q-value |
|----------------------------|----------|-------------|
| cytoskeleton               | 1.21E-06 | 3.91E-04    |
| cell projection part       | 5.75E-05 | 1.54E-02    |
| membrane-bounded organelle | 1.40E-04 | 2.81E-02    |
| neuron part                | 2.24E-04 | 3.60E-02    |
| cell projection            | 3.06E-04 | 3.52E-02    |
| neuronal cell body         | 5.74E-04 | 5.14E-02    |

**Biological function of 146 genes with IEZ > 0**

| Description                                    | P-value  | FDR q-value |
|------------------------------------------------|----------|-------------|
| protein binding                                | 3.08E-09 | 1.47E-05    |
| ion binding                                    | 4.80E-08 | 1.15E-04    |
| anion binding                                  | 1.89E-07 | 3.02E-04    |
| Ras guanyl-nucleotide exchange factor activity | 1.17E-06 | 1.12E-03    |
| nucleoside phosphate binding                   | 2.96E-06 | 2.36E-03    |
| cytoskeletal protein binding                   | 5.92E-06 | 3.54E-03    |

**Supplementary Table 5.**

Functional and component enrichment of genes that increase in expression after treatment of STHdh Q111 cells with DOP compared to untreated cells, and that also show an increase in H3K9ac in their promoters.

| <b>Ordinal Categories</b> | <b>Vonsattel grade</b> | <b>No. of samples</b> |
|---------------------------|------------------------|-----------------------|
| <b>1</b>                  | <b>Control</b>         | <b>32</b>             |
| <b>2</b>                  | <b>HD Grade 0 or 1</b> | <b>16</b>             |
| <b>3</b>                  | <b>HD Grade 2</b>      | <b>16</b>             |
| <b>4</b>                  | <b>HD Grade 3 or 4</b> | <b>6</b>              |

**Supplementary Table 6.**

Four ordinal categories for control and HD samples, representing the degree of neurodegeneration. Additionally, the table shows the number and Vonsattel grade of samples in each category.

**Supplementary Figures:**

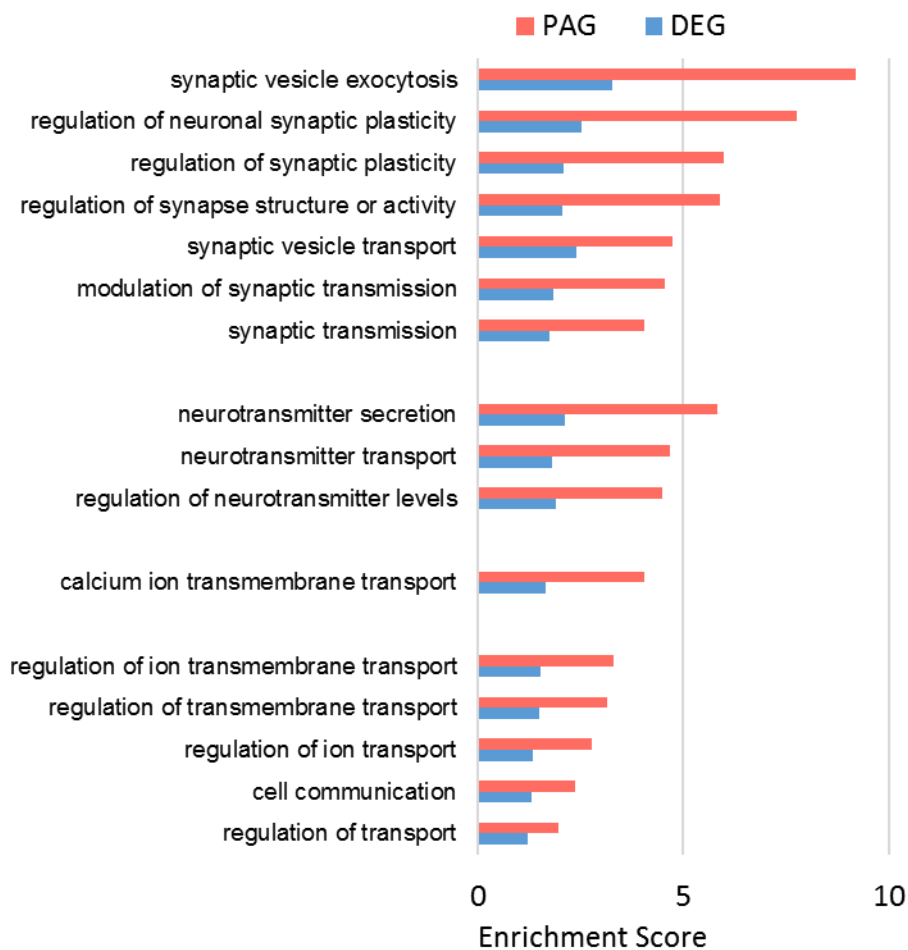

**Supplementary Figure 1.**

Comparison of the enrichment of phenotype-associated genes (PAGs) and differentially expressed genes (DEGs) in the known dysregulated biological processes in HD. The horizontal bars show the enrichment value of biological processes.



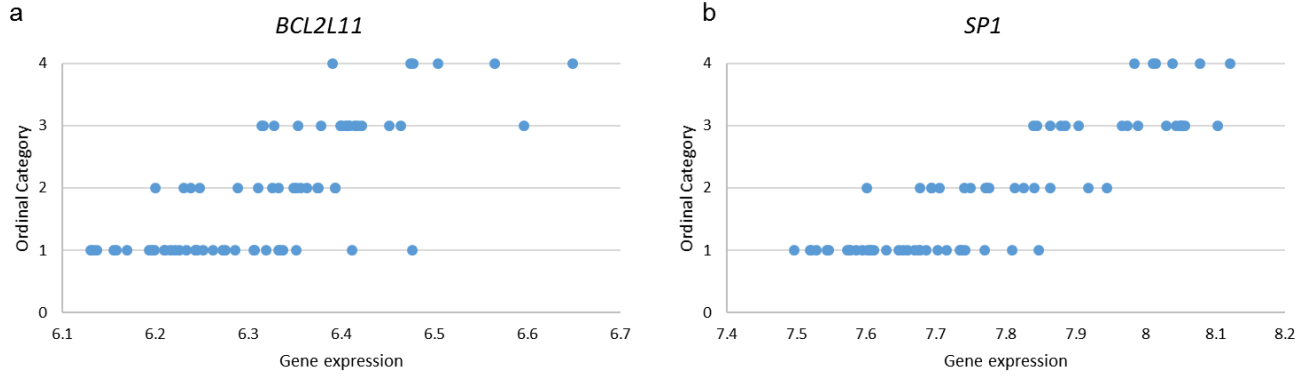

**Supplementary Figure 2.**

The expression of *BCL2L11* (a) and *SP1* (b), which are the top two ranked phenotype associated genes, with the ordinal category of neurodegeneration. Each dot shows the expression of the gene from a sample with ordinal neurodegenerative grade  $y$ .

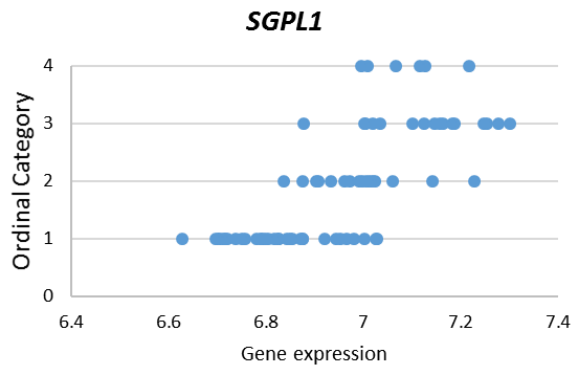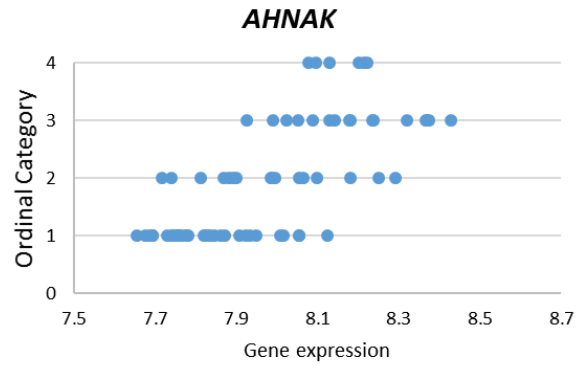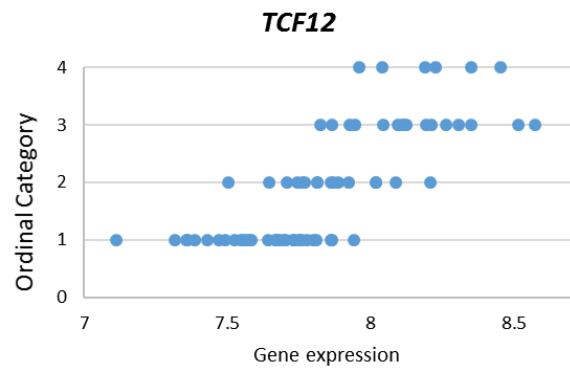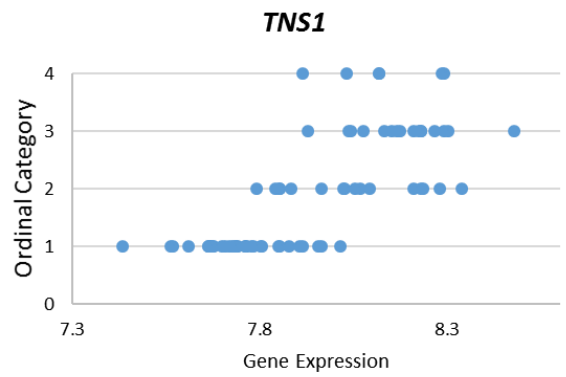

**Supplementary Figure 3.**

The expression of high-ranked up-regulated genes, including *SGPL1*, *AHNAK*, *TCF12*, and *TNS1*, that are also differentially expressed in STHdh cell line model, with the ordinal category of neurodegeneration. Dots display the expression of genes from samples with ordinal neurodegenerative grade *y*.

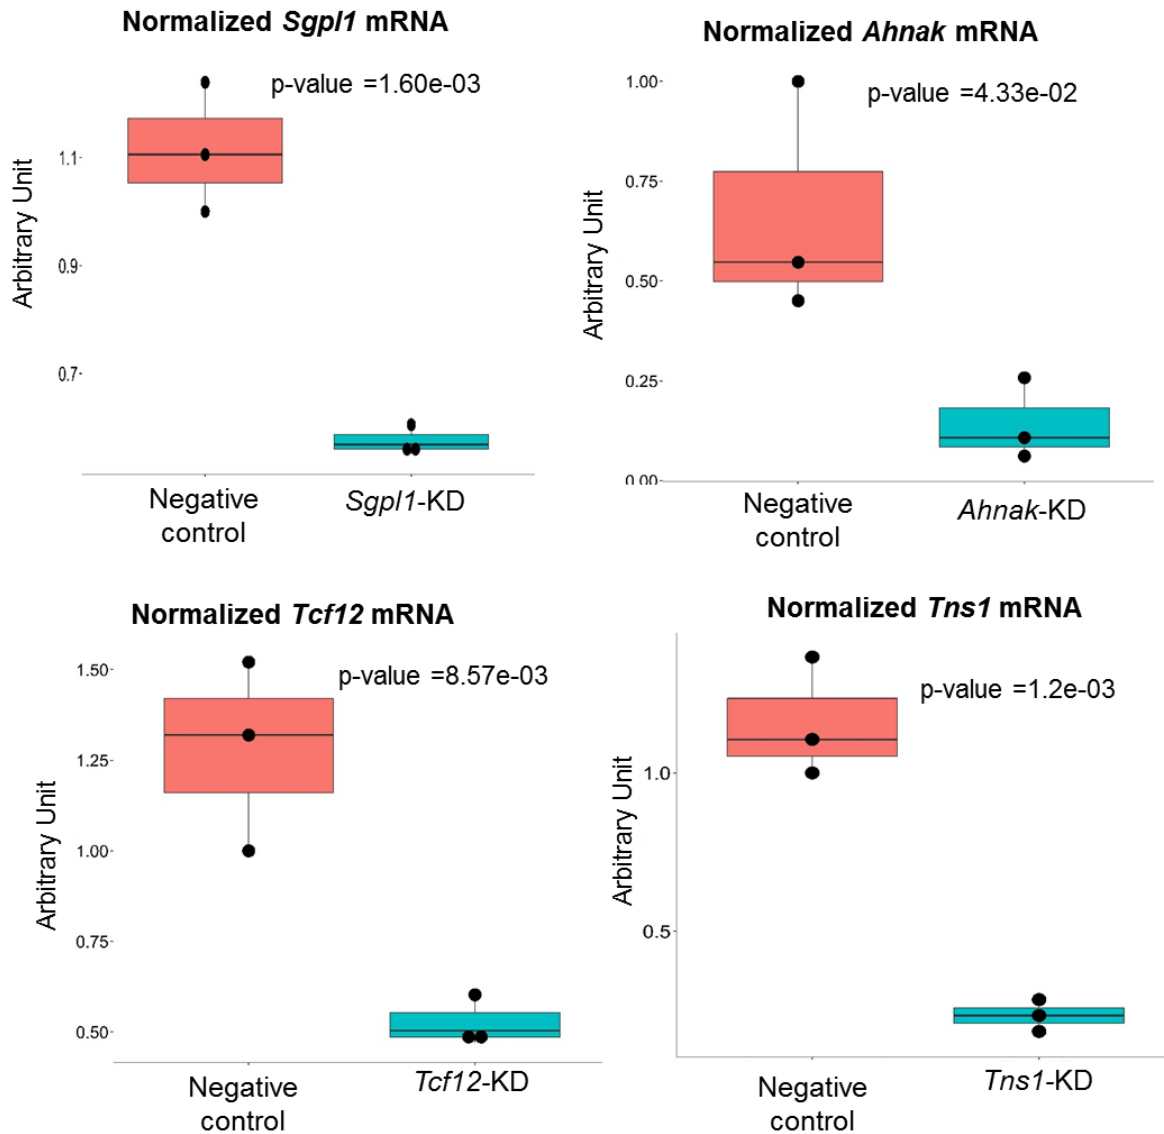

**Supplementary Figure 4.**

The plots show a significant decrease in the normalized mRNA levels of *Sgpl1* (p-value= $1.6 \times 10^{-3}$ ), *Ahnak* (p-value= $4.3 \times 10^{-2}$ ), *Tcf12* (p-value= $8.57 \times 10^{-3}$ ), and *Tns1* (p-value= $1.2 \times 10^{-3}$ ) after knock-down experiments. The boxes show the distribution of relative mRNA levels, measured by real time RT-PCR and expressed as the  $2^{-\Delta\Delta CT}$  values. Two-tailed t-test were performed to calculate statistical significance. The first and the third quartiles of the data are displayed by the top and the bottoms of respective boxes and the median (second quartile value) is shown as a horizontal line within the box.

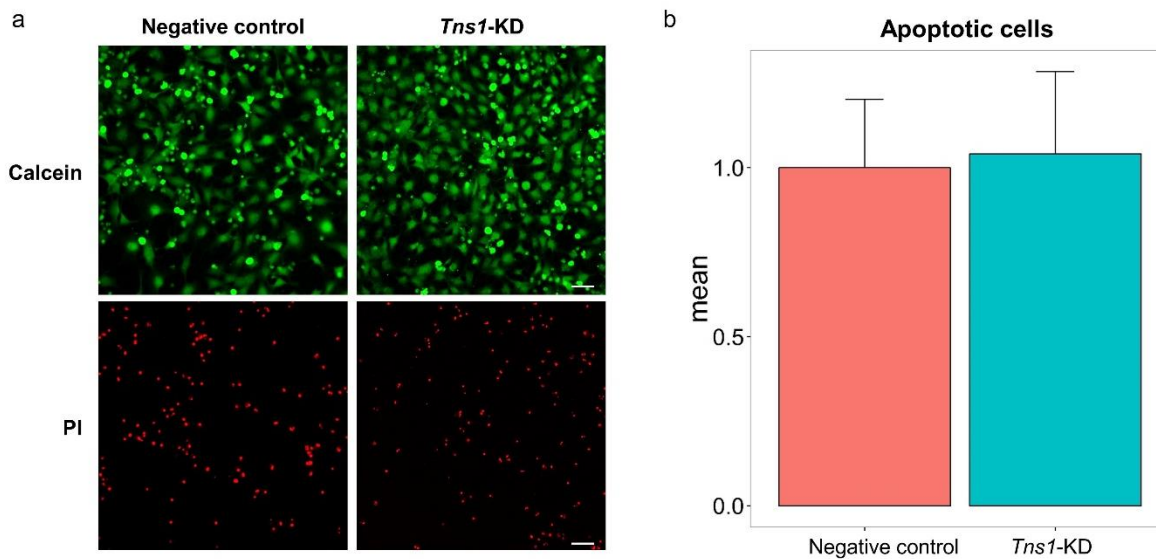

**Supplementary Figure 5.**

(a) Cell viability after knocking-down *Tns1* in STHdh Q111 cells compared to controls. Calcein (green) stains viable cells, and propidium iodide (PI – red) shows late apoptotic cells. Scale bar = 10  $\mu$ m. (b) The number of apoptotic cells are represented as fold changes normalized to the control. Two-tailed t-test were performed to calculate statistical significance. The bar shows the mean value and the error bars indicate the standard deviation.

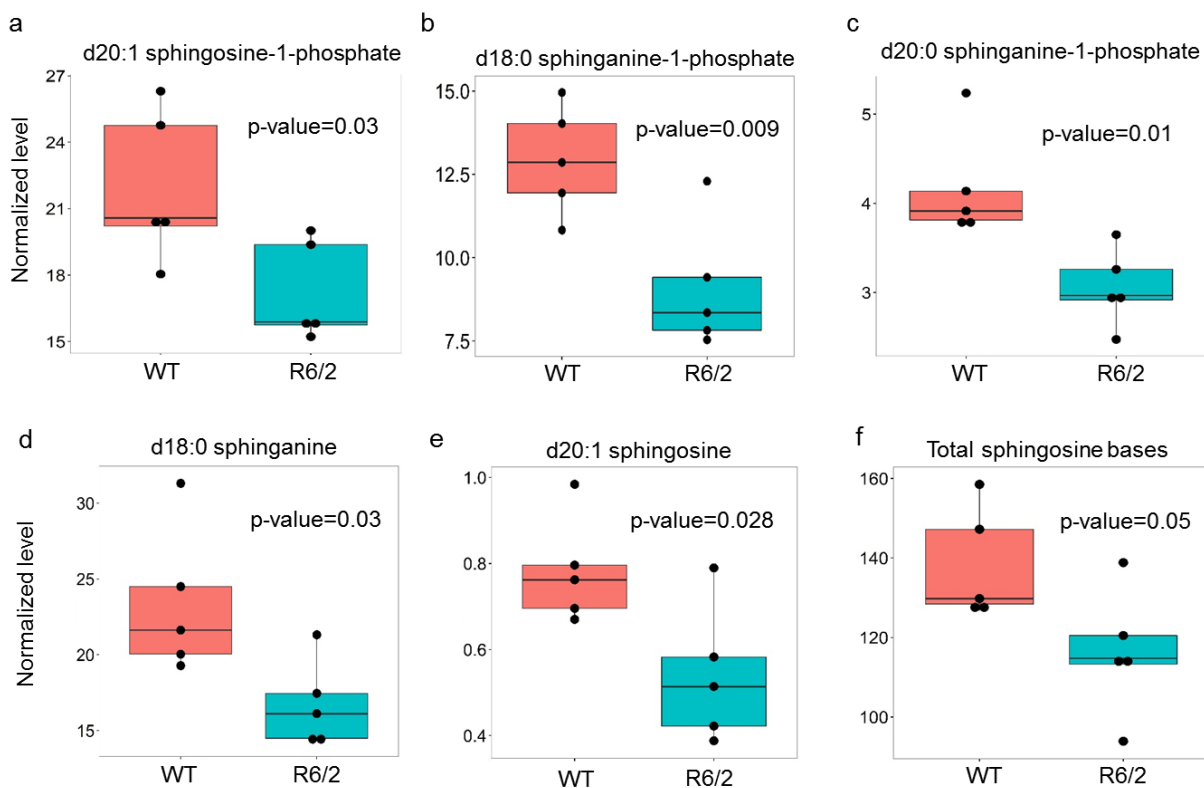

### Supplementary Figure 6.

R6/2 model of HD exhibit decreased levels of sphingosine metabolites in striatum. The levels of several sphingolipids such as d20:1 sphingosine-1-phosphate (a), d18:0 sphinganine-1-phosphate (b), d20:0 sphinganine-1-phosphate (c), d18:0 sphinganine (d) d20:1 sphingosine (e) are significantly decreased in the striatum of R6/2 mice compared to wild-type controls.

Additionally, total levels of sphingosine bases were decreased (f). All values are normalized to total protein input and are expressed as pmol/mg protein. Statistical significance was calculated using two-tailed t-test (n=5 per group). The boxplots display the distribution of the level of these sphingolipids. The first and the third quartiles of the data are displayed by the top and the bottoms of respective boxes and the median (second quartile value) is represented as a horizontal line.

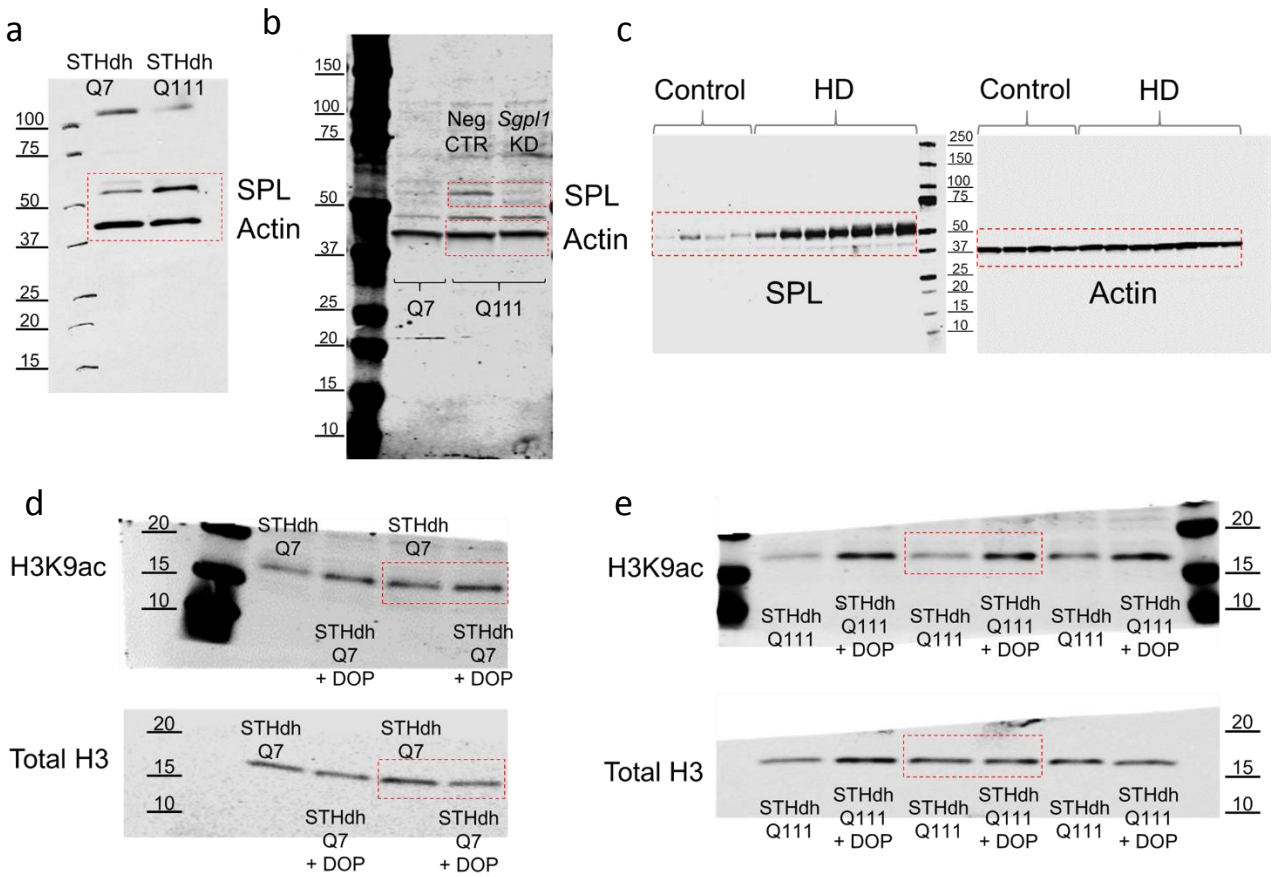

**Supplementary Figure 7.**

This image shows the uncropped version of Fig. 4a (a), Fig. 4b (b), Fig 4c (c), Fig. 8a for STHdh Q7 (d) and STHdh Q111 (e). The red boxes indicate the cropped area used to generate the figures in the main article.
